| <b>S2 Table. Details of unplanned medical contact and NOAC interruption.</b> |                                    |                            |
|------------------------------------------------------------------------------|------------------------------------|----------------------------|
| <b>Outcome</b>                                                               | <b>Tranexamic acid<br/>(N=106)</b> | <b>Placebo<br/>(N=112)</b> |
| <b>Unplanned medical contact – no. (%)*</b>                                  | -                                  | -                          |
| Bleeding                                                                     | 7 (6.6)                            | 15 (13.4)                  |
| Infection                                                                    | 3 (2.8)                            | 7 (6.3)                    |
| Other                                                                        | 0                                  | 5 (4.5)                    |
| <b>NOAC interruption – no. (%)</b>                                           | -                                  | -                          |
| Bleeding                                                                     | 3 (2.8)                            | 6 (5.4)                    |
| Accidental                                                                   | 1 (0.9)                            | 2 (1.8)                    |
| Doctor's advice                                                              | 1 (0.9)                            | 0                          |
| Patient's preference                                                         | 1 (0.9)                            | 1 (0.9)                    |
| In preparation for surgery                                                   | 2 (1.9)                            | 3 (2.7)                    |

Number of patients are reported.

\*These data are not mutually exclusive.
