# Supplementary material for: Tranexamic acid and bleeding in patients treated with non-vitamin K oral anticoagulants undergoing dental extraction: The EXTRACT-NOAC randomized clinical trial
Source: PLOS journal article supplement (doi:10.1371/journal.pmed.1003601), 2021-05-03
Supplement: S4 (10.1371/journal.pmed.1003601.s004) [file journal.pmed.1003601.s004]

| <b>S1 Table. Details of dental extractions according to treatment group.</b> |                                    |                            |
|------------------------------------------------------------------------------|------------------------------------|----------------------------|
| <b>Variable</b>                                                              | <b>Tranexamic acid<br/>(N=106)</b> | <b>Placebo<br/>(N=112)</b> |
| <b>Indication of dental extraction – no. (%)*</b>                            | -                                  | -                          |
| Abscess                                                                      | 23 (21.7)                          | 20 (17.9)                  |
| Periodontal disease                                                          | 37 (34.9)                          | 33 (29.5)                  |
| Tooth decay                                                                  | 70 (66.0)                          | 74 (66.1)                  |
| Other indications†                                                           | 5 (4.7)                            | 10 (8.9)                   |
| <b>Surgical procedures – no. (%)*</b>                                        | -                                  | -                          |
| Stitches                                                                     | 105 (99.1)                         | 111 (99.1)                 |
| Burring                                                                      | 23 (21.7)                          | 28 (25.0)                  |
| Additional hemostatics‡                                                      | 48 (45.3)                          | 39 (34.8)                  |
| Antibiotics                                                                  | 22 (20.8)                          | 27 (24.1)                  |
| Chlorhexidine mouthwash prescribed                                           | 48 (45.3)                          | 66 (58.9)                  |
| Leukocyte- and Platelet-Rich Fibrin                                          | 9 (8.6)                            | 17 (15.2)                  |
| <b>Number of extracted teeth – no. (%)</b>                                   | -                                  | -                          |
| 1 tooth                                                                      | 45 (42.5)                          | 55 (49.1)                  |
| 2 teeth                                                                      | 14 (13.2)                          | 18 (16.1)                  |
| 3-4 teeth                                                                    | 22 (20.8)                          | 21 (18.8)                  |
| ≥ 5 teeth                                                                    | 25 (23.6)                          | 18 (16.1)                  |
| <b>Maxilla or mandible – no. (%)</b>                                         | -                                  | -                          |
| Maxilla                                                                      | 40 (37.8)                          | 41 (36.6)                  |
| Mandible                                                                     | 43 (40.6)                          | 48 (42.9)                  |
| Maxilla and mandible                                                         | 23 (21.7)                          | 23 (20.5)                  |
| <b>Incisors/canines or molars – no. (%)</b>                                  | -                                  | -                          |
| Incisors/canines                                                             | 16 (15.1)                          | 12 (10.7)                  |
| Molars                                                                       | 54 (50.9)                          | 70 (62.5)                  |
| Incisors or canines and molars                                               | 36 (34.0)                          | 30 (26.8)                  |

Number of patients are reported. Percentages may not total 100 because of rounding.

\*These data are not mutually exclusive.

†Other most-common indications for tooth extraction were root resorption, tooth extraction prior to organ transplantation or to an oncological treatment or to the use of bisphosphonates.

‡Additional hemostatics included gauze compression and resorbable oxidized cellulose materials.
